# Supplementary material for: Whole-Genome Sequencing Analyses Reveal the Evolution Mechanisms of Typical Biological Features of Decapterus maruadsi
Source: MDPI journal article supplement (doi:10.3390/ani14081202), 2024-04-17
Supplement: s1 [file s1]

# Supplementary Materials S1

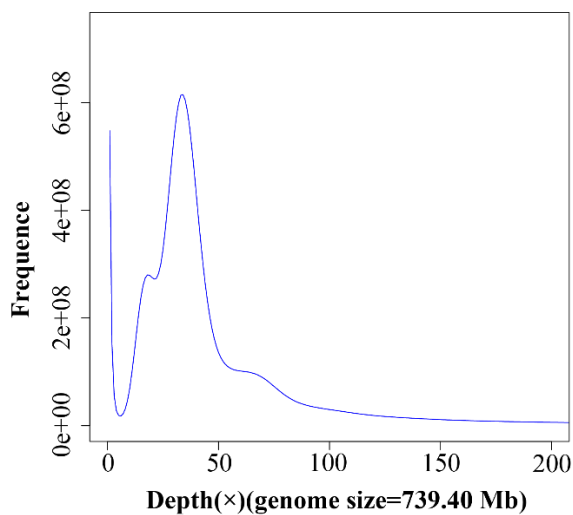

**Figure S1.** Distribution profiles of 17-mer analysis of Illumina reads.

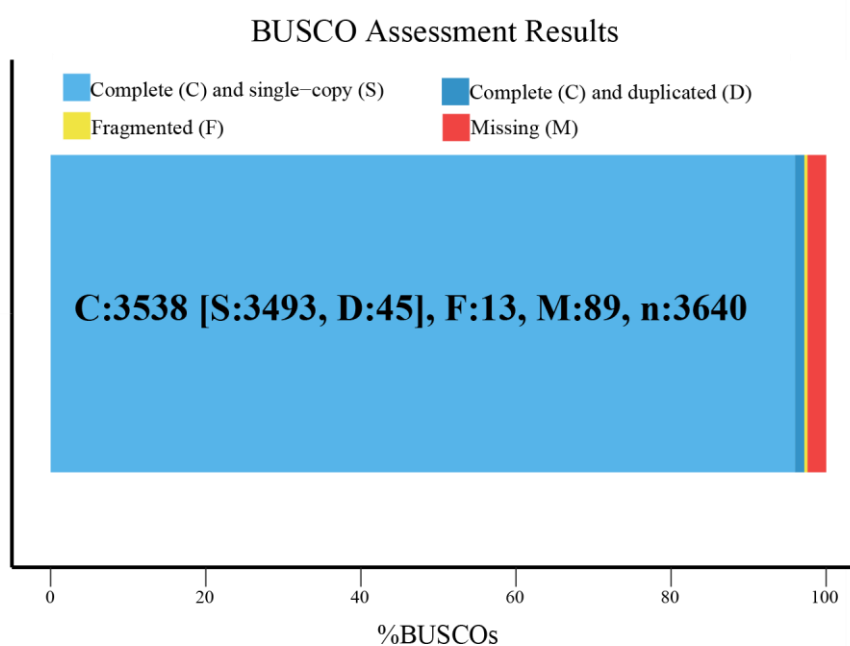

**Figure S2.** BUSCO assessment results of *D. maruadsi* genome.

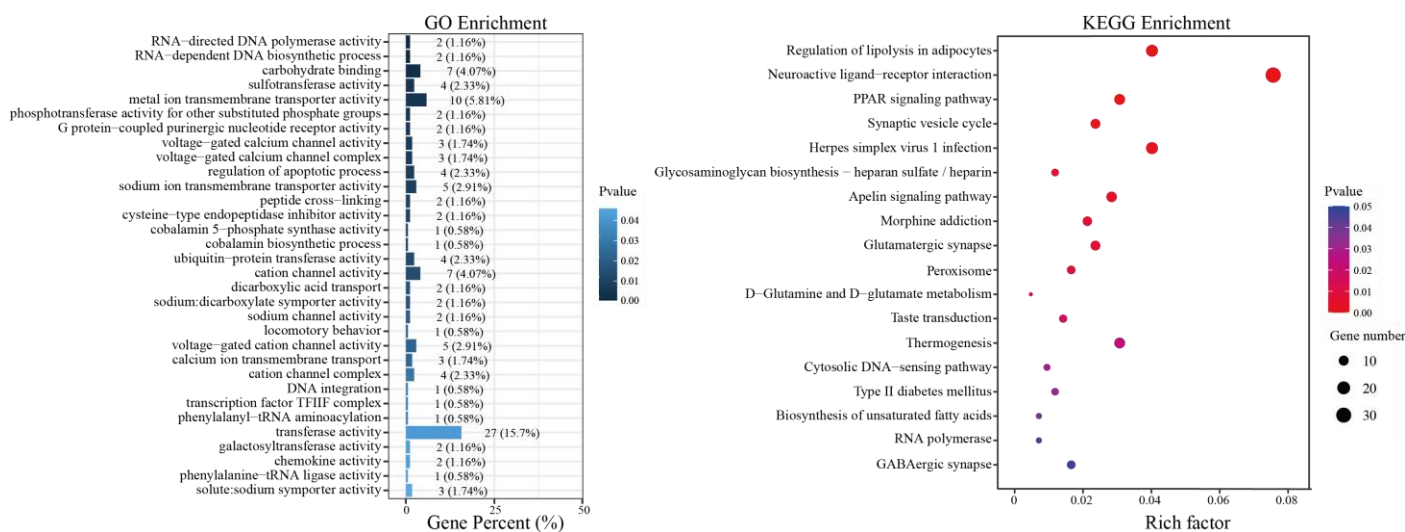

Figure S3. GO and KEGG enrichments of unique gene families to *D. maruadsi*.

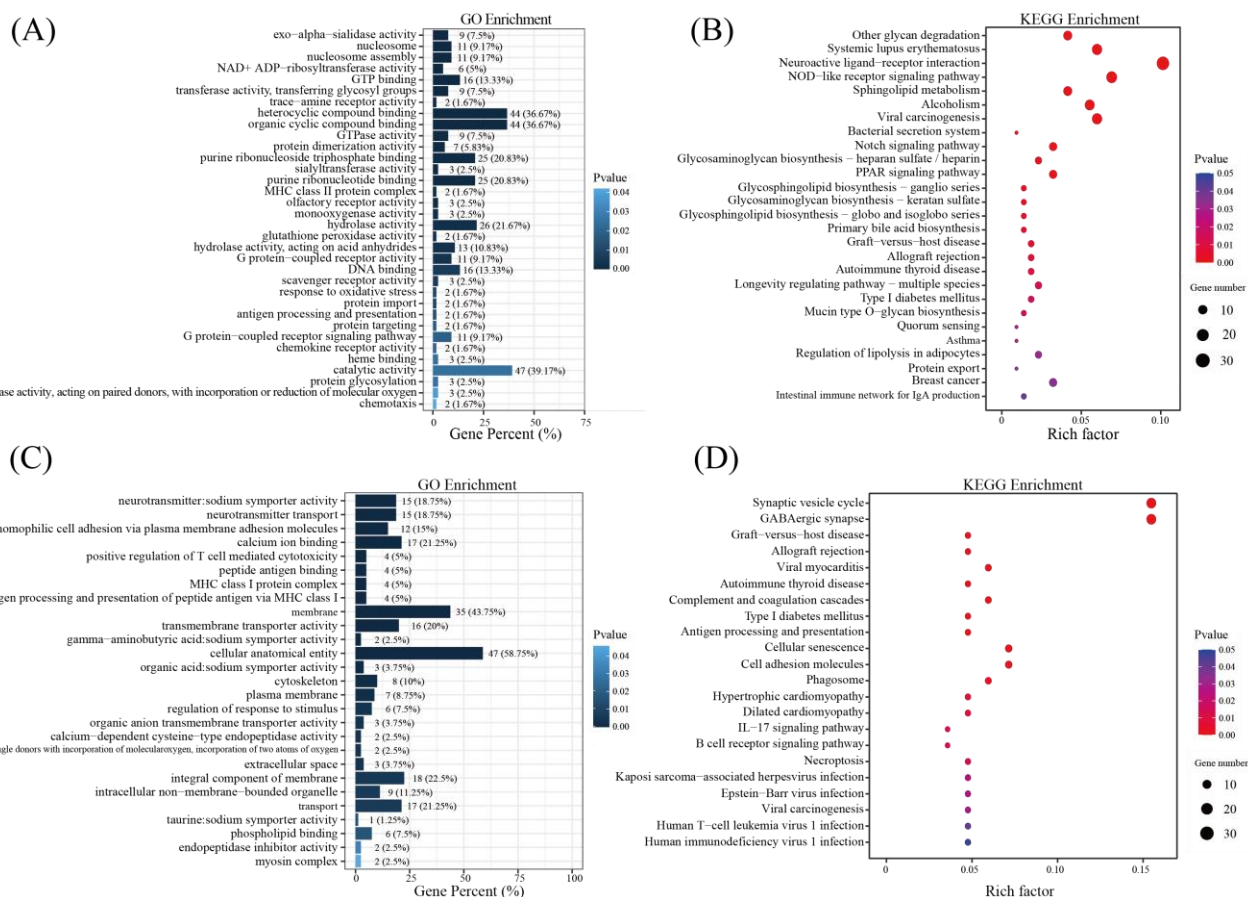

Figure S4. GO and KEGG enrichments of 73 expanded (A and B) and 52 contracted (C and D) gene families in *D. maruadsi*.

**Table S1.** Types and counts of Di-Tags identified in preliminary Hi-C sequencing data.

| Di-Tag Type                         | Di-Tags Number |
|-------------------------------------|----------------|
| Total Di-Tags                       | 6,544,378      |
| Valid Di-Tags                       | 5,564,284      |
| Same circularized Di-Tags           | 9,091          |
| Same fragment dangling ends Di-Tags | 14,054         |
| Same fragment internal Di-Tags      | 50,650         |
| Re-ligation Di-Tags                 | 173,112        |
| Contiguous Di-Tags                  | 144,769        |
| Wrong size Di-Tags                  | 588,418        |

**Table S2.** HiCUP de-duplication, trans, and cis quantity statistics.

| Di-Tag Type                 | All Di-Tags | Unique Di-Tags |
|-----------------------------|-------------|----------------|
| Valid Di-Tags               | 5,564,284   | 5,176,451      |
| Cis-close Di-Tags (< 10Kbp) | 526,555     | 489,982        |
| Cis-far Di-Tags (> 10Kbp)   | 2,046,773   | 1,904,000      |
| Trans Di-Tags               | 2,990,956   | 2,782,469      |

**Table S3.** Statistics of Illumina RNA-Seq data.

| Sam-<br>ple | Raw<br>Reads | Raw<br>Base<br>(G) | Clean<br>Reads | Clean<br>Base<br>(G) | Effec-<br>tive<br>Rate (%) | Error<br>Rate<br>(%) | Q20<br>(%) | Q30<br>(%) | GC Con-<br>tent (%) |
|-------------|--------------|--------------------|----------------|----------------------|----------------------------|----------------------|------------|------------|---------------------|
| Heart       | 21,793,184   | 6.54               | 20,817,200     | 6.25                 | 95.52                      | 0.03                 | 97.69      | 93.54      | 49.8                |
| Liver       | 19,697,155   | 5.91               | 18,887,824     | 5.67                 | 95.89                      | 0.03                 | 97.72      | 93.55      | 50.4                |
| Muscle      | 21,446,521   | 6.43               | 20,827,273     | 6.25                 | 97.11                      | 0.03                 | 97.83      | 93.85      | 52.83               |

**Table S4.** Repeat sequences in the *D. maruadsii* genome.

| RepeatType          | length (bp) | Percent   |
|---------------------|-------------|-----------|
| Tandem repeat       | 72,744,333  | 10.16%    |
| Interspersed repeat | 202,151,366 | 28.23%    |
| DNA TE              | 82,090,490  | 11.46%    |
| LINE TE             | 37,075,462  | 5.18%     |
| SINE TE             | 1,928,796   | 0.27%     |
| LTR TE              | 62,252,932  | 8.69%     |
| Other               | 55          | 0.000008% |
| Unknown             | 5,046,848   | 0.70%     |
| Total               | 274,895,699 | 38.39%    |

**Table S5.** Classification and annotation statistics of ncRNA in the *D. maruadsi* genome.

| ncRNA type |          | Copy  | Average length (bp) | Total length (bp) | Genome coverage (%) |
|------------|----------|-------|---------------------|-------------------|---------------------|
| miRNA      |          | 1,829 | 128.01              | 234,126           | 0.032690            |
| tRNA       |          | 2,842 | 75.54               | 214,675           | 0.029980            |
| rRNA       | rRNA     | 5,310 | 112.79              | 598,939           | 0.083630            |
|            | 18S      | 1,809 | 102.40              | 185,249           | 0.025870            |
|            | 28S      | 82    | 181.27              | 14,864            | 0.002076            |
|            | 5.8S     | 2     | 156                 | 312               | 0.000044            |
|            | 5S       | 3,417 | 116.63              | 398,514           | 0.055650            |
| snRNA      | snRNA    | 438   | 130.53              | 57,170            | 0.007983            |
|            | CD-box   | 132   | 114.02              | 15,050            | 0.002101            |
|            | HACA-box | 104   | 160.45              | 16,687            | 0.002330            |
|            | Splicing | 188   | 120.93              | 22,734            | 0.003174            |

**Table S6.** KEGG enrichment analysis of unique, expanded, and contracted gene families.

| <b>1. Unique (459 gene families, 22 KEGG pathways, P&lt;0.05)</b>   |             |                                                                                              |
|---------------------------------------------------------------------|-------------|----------------------------------------------------------------------------------------------|
| KEGG pathways                                                       | P-value     | Genes                                                                                        |
| Regulation of lipolysis in adipocytes                               | 2.25E-09    | <i>SAMD3, TSHB, INS, ADCY1, ADORA1</i>                                                       |
| Neuroactive ligand-receptor interaction                             | 3.93E-09    | <i>GRM4, TSHB, P2YR13, GHRHR, CCR2, CER2, PRSS3P2, F9, GRIN2B</i>                            |
| PPAR signaling pathway                                              | 1.16E-06    | <i>SAMD3, UB-EP52</i>                                                                        |
| Synaptic vesicle cycle                                              | 0.001071912 | <i>TRNP1, SLC1A1, CACNA1A, SNAP25A, SLC6A13, SLC18A2</i>                                     |
| Herpes simplex virus 1 infection                                    | 0.001799729 | <i>BCL2L1, MAP6, AUTS2, PCED1A, MR1, ZNF23, ZNP37, ZNF836, MSANTD1</i>                       |
| Glycosaminoglycan biosynthesis - heparan sulfate / heparin          | 0.003559977 | <i>HS3ST2, HS3ST3B1, KMT5A-B</i>                                                             |
| Apelin signaling pathway                                            | 0.004283059 | <i>SAMD3, ADCY1</i>                                                                          |
| Morphine addiction                                                  | 0.005512089 | <i>CACNA1A, GABBR2, KCNJ3, PDE1C, ADCY1, ADORA1</i>                                          |
| Glutamatergic synapse                                               | 0.006400018 | <i>GRM4, SLC1A1, CACNA1A, GRIN2B, KCNJ3, ADCY1, GLS2, GRM7, GABBR2, HTR2A, ADORA1, GRID1</i> |
| Peroxisome                                                          | 8.87E-03    | <i>ADF1, SPCC569.03</i>                                                                      |
| D-Glutamine and D-glutamate metabolism                              | 0.009746174 | <i>GLUD1, GLS2</i>                                                                           |
| Taste transduction                                                  | 0.015766369 | <i>GRM4, CACNA1A, ASIC2, GABBR2, PED1C</i>                                                   |
| Thermogenesis                                                       | 0.024270538 | <i>SAMD3, NPR1, ADCY1</i>                                                                    |
| Cytosolic DNA-sensing pathway                                       | 0.029025412 | <i>CARD18, POLR3GL, CCL13</i>                                                                |
| Type II diabetes mellitus                                           | 0.032036904 | <i>INS, CACNA1A</i>                                                                          |
| Biosynthesis of unsaturated fatty acids                             | 0.039633352 | <i>SPCC569.03, TECR</i>                                                                      |
| RNA polymerase                                                      | 0.042252218 | <i>HI-0712, POLR3GL</i>                                                                      |
| GABAergic synapse                                                   | 0.046867096 | <i>CACNA1A, GABBR2, ADCY1, GLS2, SLC6A13</i>                                                 |
| <b>2. Expansion (73 gene families, 27 KEGG pathways, P&lt;0.05)</b> |             |                                                                                              |

| KEGG pathways                                               | P-value     | Genes                                     |
|-------------------------------------------------------------|-------------|-------------------------------------------|
| Other glycan degradation                                    | 1.60E-10    | <i>NEU2, NEU3</i>                         |
| Systemic lupus erythematosus                                | 7.00E-10    | <i>HIST2H2L, H2-Aa</i>                    |
| Neuroactive ligand-receptor interaction                     | 1.91E-07    | <i>LPAR4, TAAR1, TAAR1s, PRSS2, CELA1</i> |
| NOD-like receptor signaling pathway                         | 4.82E-07    | <i>GVIN1, GVINP1, PYCARD</i>              |
| Sphingolipid metabolism                                     | 5.89E-07    | <i>NEU2, NEU3</i>                         |
| Alcoholism                                                  | 6.53E-06    | <i>HIST2H2L, SLC18A2</i>                  |
| Viral carcinogenesis                                        | 3.49E-05    | <i>HIST2H2L, CCR3</i>                     |
| Bacterial secretion system                                  | 4.55E-04    | <i>SECA</i>                               |
| Notch signaling pathway                                     | 4.77E-04    | <i>HES5</i>                               |
| Glycosaminoglycan biosynthesis - heparan sulfate / heparin  | 4.86E-04    | <i>KMT5AA</i>                             |
| PPAR signaling pathway                                      | 1.06E-03    | <i>SAMD3, CYP8B1</i>                      |
| Glycosphingolipid biosynthesis - ganglio series             | 3.52E-03    | <i>ST3GAL1</i>                            |
| Glycosaminoglycan biosynthesis - keratan sulfate            | 0.003944136 | <i>ST3GAL1</i>                            |
| Glycosphingolipid biosynthesis - globo and iso-globo series | 0.003944136 | <i>ST3GAL1</i>                            |
| Primary bile acid biosynthesis                              | 0.004397271 | <i>CYP8B1</i>                             |
| Graft-versus-host disease                                   | 0.004440917 | <i>H2-Aa, PRF1</i>                        |
| Allograft rejection                                         | 0.006467993 | <i>H2-Aa, PRF1</i>                        |
| Autoimmune thyroid disease                                  | 0.00856437  | <i>H2-Aa, PRF1</i>                        |
| Longevity regulating pathway - multiple species             | 0.013193295 | <i>HSP30</i>                              |
| Type I diabetes mellitus                                    | 0.016651602 | <i>H2-Aa, PRF1</i>                        |
| Mucin type O-glycan biosynthesis                            | 0.017091155 | <i>ST3GAL1</i>                            |
| Quorum sensing                                              | 0.027518865 | <i>SECA</i>                               |
| Asthma                                                      | 0.030028533 | <i>H2-Aa</i>                              |
| Regulation of lipolysis in adipocytes                       | 0.032621052 | <i>SAMD3, NPR1</i>                        |
| Protein export                                              | 0.032625497 | <i>SECA</i>                               |
| Breast cancer                                               | 0.035453539 | <i>HES5</i>                               |
| Intestinal immune network for IgA production                | 0.039931832 | <i>BTN1A1, H2-Aa</i>                      |

### 3. Contraction (52 gene families, 22 KEGG pathways, P<0.05)

| KEGG pathways                       | P-value     | Genes                           |
|-------------------------------------|-------------|---------------------------------|
| Synaptic vesicle cycle              | 5.18E-14    | <i>SLC6A1, SLC6A13, SLC6A11</i> |
| GABAergic synapse                   | 1.15E-13    | <i>SLC6A1, SLC6A13, SLC6A11</i> |
| Graft-versus-host disease           | 7.37E-05    | <i>MR1</i>                      |
| Allograft rejection                 | 0.000111569 | <i>MR1</i>                      |
| Viral myocarditis                   | 0.000123025 | <i>MR1, MYH6</i>                |
| Autoimmune thyroid disease          | 0.000152551 | <i>MR1</i>                      |
| Complement and coagulation cascades | 0.000161749 | <i>A2M, PZP, VWF</i>            |
| Type I diabetes mellitus            | 0.000324347 | <i>MR1</i>                      |
| Antigen processing and presentation | 0.000533348 | <i>MR1</i>                      |
| Cellular senescence                 | 0.000970876 | <i>MR1, CAPN1</i>               |
| Cell adhesion molecules             | 0.001973494 | <i>MR1, VCAM1, CD22</i>         |
| Phagosome                           | 0.002318501 | <i>MR1, SIGLEC1</i>             |
| Hypertrophic cardiomyopathy         | 0.007662597 | <i>TTN</i>                      |
| Dilated cardiomyopathy              | 0.009824885 | <i>TTN</i>                      |
| IL-17 signaling pathway             | 0.012604647 | <i>MUC5AC, MUC5B</i>            |
| B cell receptor signaling pathway   | 0.01319698  | <i>VCAM1, CD22, SIGLEC1</i>     |

---

|                                                 |             |                     |
|-------------------------------------------------|-------------|---------------------|
| Necroptosis                                     | 0.013346317 | <i>CAPN1, ALOX5</i> |
| Kaposi sarcoma-associated herpesvirus infection | 0.02493976  | <i>MR1</i>          |
| Epstein-Barr virus infection                    | 0.026791833 | <i>MR1</i>          |
| Viral carcinogenesis                            | 0.027427207 | <i>MR1</i>          |
| Human T-cell leukemia virus 1 infection         | 0.042059176 | <i>MR1</i>          |
| Human immunodeficiency virus 1 infection        | 0.048056403 | <i>MR1</i>          |

---
